# Supplementary material
Source: MDPI journal article supplement (https://www.mdpi.com/2073-4441/16/6/856)
Supplement: s1 [file s1]

**Table S1. Physiochemical parameters of water quality analyses of Sanghar district (subdistrict Sangahr, Khipro and Jam Nawaz Ali)**

| Sample ID | pH   | EC<br>µs/cm | Salinity<br>g/L | TDS<br>mg/L | NO <sub>2</sub><br>µg/L | NO <sub>3</sub><br>mg/L | T.PO <sub>4</sub><br>mg/L | O.PO <sub>4</sub><br>mg/L | T.H<br>mg/L | Cl<br>mg/L | Alk<br>mg/L | SO <sub>4</sub><br>mg/L |
|-----------|------|-------------|-----------------|-------------|-------------------------|-------------------------|---------------------------|---------------------------|-------------|------------|-------------|-------------------------|
| S1        | 7.4  | 2176        | 1.1             | 1393        | 1.85                    | 2.1                     | 0.86                      | 0.25                      | 320         | 270        | 280         | 236                     |
| S2        | 7.44 | 1492        | 0.7             | 955         | 3.29                    | 6.39                    | 0.71                      | 0.32                      | 260         | 145        | 255         | 96                      |
| S3        | 7.5  | 5730        | 3.1             | 3667        | 3.47                    | 2.49                    | 0.57                      | 0.26                      | 788         | 750        | 360         | 762                     |
| S4        | 7.38 | 1203        | 0.6             | 770         | 3.19                    | 1.11                    | 0.63                      | 0.24                      | 240         | 130        | 235         | 90                      |
| S5        | 8.46 | 424         | 0.2             | 271         | 3.15                    | 2.99                    | 0.26                      | 0.19                      | 120         | 34         | 120         | 28                      |
| S6        | 7.47 | 2856        | 1.5             | 1828        | 3.33                    | 2.14                    | 0.29                      | 0.22                      | 430         | 350        | 352         | 448                     |
| S7        | 7.44 | 2161        | 1.1             | 1383        | 3.1                     | 4.12                    | 0.65                      | 0.25                      | 320         | 254        | 326         | 220                     |
| S8        | 7.48 | 2160        | 1.1             | 1383        | 3.38                    | 1.43                    | 1.07                      | 0.46                      | 320         | 260        | 301         | 234                     |
| S9        | 7.31 | 2576        | 1.3             | 1649        | 3.19                    | 1.79                    | 0.58                      | 0.3                       | 400         | 310        | 334         | 326                     |
| S10       | 7.84 | 1265        | 0.6             | 810         | 3.1                     | 1.29                    | 0.65                      | 0.5                       | 250         | 136        | 245         | 135                     |
| S11       | 7.54 | 1101        | 0.5             | 705         | 3.01                    | 2.56                    | 1.07                      | 0.48                      | 240         | 132        | 231         | 88                      |
| S12       | 7.9  | 531         | 0.3             | 340         | 3.15                    | 0.69                    | 0.6                       | 0.41                      | 160         | 48         | 158         | 27                      |
| S13       | 7.3  | 2495        | 1.3             | 1597        | 3.38                    | 2.18                    | 0.69                      | 0.54                      | 340         | 300        | 334         | 240                     |
| S14       | 7.66 | 2960        | 1.5             | 1894        | 2.96                    | 3.94                    | 0.54                      | 0.32                      | 440         | 378        | 362         | 454                     |
| S15       | 7.39 | 1252        | 0.6             | 801         | 3.24                    | 2.49                    | 0.72                      | 0.37                      | 260         | 142        | 248         | 136                     |
| S16       | 6.74 | 1251        | 0.6             | 801         | 3.24                    | 1.82                    | 0.71                      | 0.35                      | 250         | 135        | 244         | 134                     |
| S17       | 7.85 | 1813        | 0.9             | 1160        | 2.87                    | 2.21                    | 0.53                      | 0.24                      | 260         | 176        | 260         | 202                     |
| S18       | 7.67 | 1458        | 0.7             | 933         | 4.17                    | 3.06                    | 0.71                      | 0.35                      | 260         | 142        | 244         | 104                     |
| S19       | 8.61 | 789         | 0.4             | 505         | 2.64                    | 5.22                    | 0.53                      | 0.42                      | 180         | 74         | 208         | 53                      |
| S20       | 8.22 | 1763        | 0.9             | 1128        | 2.64                    | 4.93                    | 0.58                      | 0.36                      | 280         | 182        | 250         | 192                     |
| S21       | 7.54 | 1668        | 0.8             | 1068        | 2.5                     | 2.99                    | 0.66                      | 0.56                      | 270         | 176        | 248         | 178                     |
| S22       | 7.96 | 399         | 0.2             | 255         | 2.64                    | 3.24                    | 0.69                      | 0.51                      | 140         | 28         | 136         | 36                      |
| S23       | 7.69 | 2072        | 1.1             | 1326        | 4.75                    | 1.68                    | 0.62                      | 0.7                       | 310         | 260        | 272         | 226                     |
| S24       | 7.82 | 2066        | 1.1             | 1322        | 3.24                    | 2.03                    | 0.83                      | 0.66                      | 320         | 258        | 268         | 222                     |
| S25       | 8.03 | 2164        | 1.1             | 1385        | 3.47                    | 0.65                    | 0.6                       | 0.39                      | 340         | 268        | 276         | 230                     |
| S26       | 8.65 | 424         | 0.2             | 271         | 3.52                    | 1.68                    | 0.95                      | 0.72                      | 140         | 52         | 146         | 38                      |
| S27       | 7.45 | 962         | 0.5             | 616         | 2.69                    | 1.79                    | 1.08                      | 0.48                      | 220         | 124        | 226         | 82                      |
| S28       | 8.49 | 828         | 0.4             | 530         | 3.43                    | 1.43                    | 1.15                      | 0.75                      | 200         | 78         | 214         | 58                      |
| S29       | 8.02 | 2174        | 1.1             | 1391        | 3.15                    | 1.68                    | 0.72                      | 0.68                      | 320         | 272        | 290         | 248                     |
| S30       | 7.33 | 1318        | 0.7             | 844         | 3.52                    | 1.72                    | 0.65                      | 0.59                      | 240         | 140        | 252         | 138                     |
| S31       | 7.64 | 603         | 0.3             | 386         | 3.84                    | 2.71                    | 0.92                      | 0.66                      | 160         | 54         | 164         | 34                      |
| S32       | 7.32 | 2960        | 1.5             | 1894        | 4.12                    | 2.21                    | 0.99                      | 0.87                      | 380         | 384        | 362         | 448                     |
| K1        | 7.32 | 1321        | 0.7             | 846         | 4.07                    | 2.92                    | 0.61                      | 0.4                       | 260         | 152        | 258         | 88                      |
| K2        | 8.29 | 869         | 0.4             | 556         | 4.03                    | 1.4                     | 0.62                      | 0.61                      | 200         | 80         | 218         | 62                      |
| K3        | 7.57 | 1169        | 0.6             | 748         | 3.48                    | 3.8                     | 0.65                      | 0.65                      | 240         | 127        | 238         | 88                      |
| K4        | 7.62 | 1188        | 0.6             | 760         | 4.54                    | 1.33                    | 0.57                      | 0.42                      | 250         | 138        | 244         | 96                      |
| K5        | 8.27 | 2434        | 1.3             | 1558        | 4.58                    | 1.29                    | 0.73                      | 0.72                      | 300         | 280        | 306         | 218                     |
| K6        | 7.45 | 5520        | 3               | 3533        | 3.52                    | 3.66                    | 0.61                      | 0.48                      | 700         | 1144       | 790         | 1205                    |
| K7        | 7.41 | 5710        | 3.1             | 3654        | 4.58                    | 3.56                    | 1.17                      | 1.14                      | 800         | 1230       | 820         | 1319                    |
| K8        | 7.5  | 5500        | 3               | 3520        | 4.63                    | 2.07                    | 0.68                      | 0.67                      | 680         | 1122       | 785         | 1205                    |
| K9        | 7.71 | 1628        | 0.8             | 1025        | 4.17                    | 1.43                    | 1.91                      | 0.58                      | 280         | 178        | 248         | 174                     |
| K10       | 7.59 | 1628        | 0.8             | 1042        | 4.21                    | 2.14                    | 0.5                       | 0.4                       | 300         | 196        | 270         | 190                     |
| K11       | 7.63 | 2234        | 1.1             | 1430        | 4.26                    | 2.32                    | 0.55                      | 0.32                      | 360         | 278        | 284         | 218                     |
| K12       | 7.85 | 600         | 0.3             | 384         | 4.12                    | 1.26                    | 0.67                      | 0.65                      | 160         | 50         | 160         | 48                      |
| K13       | 7.83 | 613         | 0.3             | 392         | 4.9                     | 1.5                     | 1.08                      | 0.43                      | 180         | 66         | 168         | 62                      |
| K14       | 7.71 | 975         | 0.5             | 624         | 4.69                    | 3.41                    | 0.7                       | 0.6                       | 260         | 130        | 230         | 86                      |
| K15       | 7.7  | 1628        | 0.8             | 1042        | 3.52                    | 3.63                    | 0.81                      | 0.14                      | 280         | 218        | 276         | 194                     |
| K16       | 7.82 | 425         | 0.2             | 272         | 3.51                    | 5.93                    | 0.41                      | 0.36                      | 140         | 56         | 148         | 48                      |
| K17       | 7.84 | 450         | 0.2             | 288         | 3.2                     | 4.86                    | 0.34                      | 0.3                       | 160         | 66         | 162         | 62                      |
| K18       | 7.58 | 2335        | 1.2             | 1494        | 2.31                    | 5.36                    | 0.54                      | 0.3                       | 380         | 288        | 298         | 228                     |
| K19       | 8.01 | 385         | 0.2             | 246         | 3.15                    | 1.5                     | 2.46                      | 0.26                      | 140         | 40         | 138         | 32                      |

|     |      |      |     |      |      |      |      |      |     |     |     |     |
|-----|------|------|-----|------|------|------|------|------|-----|-----|-----|-----|
| K20 | 7.72 | 875  | 0.4 | 560  | 2.59 | 2.39 | 2.38 | 0.62 | 220 | 120 | 240 | 95  |
| K21 | 7.95 | 823  | 0.4 | 527  | 4.63 | 4.79 | 2.85 | 1.15 | 200 | 108 | 220 | 80  |
| K22 | 7.67 | 532  | 0.3 | 340  | 6.34 | 3.77 | 2.05 | 0.6  | 160 | 45  | 156 | 74  |
| K23 | 8.08 | 730  | 0.4 | 467  | 3.66 | 3.13 | 3.98 | 0.53 | 180 | 66  | 216 | 76  |
| K24 | 7.24 | 2569 | 1.3 | 1644 | 3.15 | 3.91 | 3.15 | 0.69 | 360 | 280 | 344 | 367 |
| K25 | 7.73 | 1166 | 0.6 | 746  | 2.08 | 4.09 | 1.01 | 0.71 | 240 | 146 | 232 | 138 |
| K26 | 7.86 | 877  | 0.4 | 561  | 2.78 | 3.7  | 0.9  | 0.57 | 220 | 124 | 202 | 101 |
| K27 | 7.64 | 1002 | 0.5 | 641  | 2.04 | 3.63 | 2.48 | 0.7  | 240 | 120 | 245 | 128 |
| K28 | 8.02 | 1104 | 0.5 | 707  | 0.09 | 2.88 | 4.47 | 0.72 | 240 | 118 | 173 | 136 |
| K29 | 7.82 | 3540 | 1.9 | 2266 | 4.12 | 4.86 | 2.81 | 0.73 | 460 | 290 | 396 | 670 |
| K30 | 7.96 | 2728 | 1.4 | 1746 | 3.66 | 3.8  | 3.47 | 0.73 | 370 | 253 | 301 | 411 |
| J1  | 7.96 | 855  | 0.4 | 547  | 220  | 1.58 | 2.74 | 2.72 | 220 | 124 | 206 | 70  |
| J2  | 7.86 | 2558 | 1.3 | 1637 | 350  | 3.29 | 7.76 | 3.07 | 350 | 246 | 298 | 357 |
| J3  | 7.91 | 1616 | 0.8 | 1034 | 270  | 2.55 | 4.79 | 2.92 | 270 | 176 | 248 | 182 |
| J4  | 7.6  | 2536 | 1.3 | 1623 | 340  | 3.19 | 3.95 | 3.02 | 340 | 244 | 296 | 346 |
| J5  | 7.99 | 2798 | 1.5 | 1791 | 400  | 2.53 | 3.51 | 2.14 | 400 | 257 | 304 | 415 |
| J6  | 7.45 | 399  | 0.2 | 255  | 140  | 2.64 | 4.19 | 0.9  | 140 | 44  | 148 | 48  |
| J7  | 7.33 | 346  | 0.2 | 221  | 126  | 3.75 | 3.24 | 1.05 | 126 | 35  | 104 | 43  |
| J8  | 7.21 | 1396 | 0.7 | 893  | 250  | 3.38 | 2.92 | 2.83 | 250 | 130 | 251 | 146 |
| J9  | 7.84 | 1009 | 0.5 | 646  | 230  | 2.69 | 2.79 | 2.67 | 230 | 88  | 215 | 119 |
| J10 | 7.88 | 1537 | 0.8 | 984  | 260  | 2.73 | 3.06 | 2.27 | 260 | 148 | 244 | 157 |
| J11 | 8.03 | 454  | 0.2 | 291  | 130  | 2.58 | 4.86 | 2.61 | 130 | 56  | 150 | 48  |
| J12 | 7.91 | 866  | 0.4 | 554  | 216  | 4.68 | 1.4  | 0.99 | 216 | 124 | 190 | 74  |

**Table S2. Analyses of essential and trace elements of Sanghar district** (subdistrict Sangahr, Khipro and Jam Nawaz Ali).

| S ID | Na<br>mg/L | K<br>mg/L | Ca<br>mg/L | Mg<br>mg/L | Mn<br>µg/L | As<br>mg/L | Fe<br>µg/L | Co<br>µg/L | Cu<br>µg/L | Ni<br>µg/L | Pb<br>µg/L | Cd<br>µg/L | F<br>mg/L | Cr<br>µg/L |
|------|------------|-----------|------------|------------|------------|------------|------------|------------|------------|------------|------------|------------|-----------|------------|
| S1   | 218        | 50        | 116        | 30         | 47         | 0.005      | 20.7       | 37.9       | 4.9        | 12.9       | 7.7        | 4.7        | 1.88      | 37         |
| S2   | 124        | 11        | 96         | 20         | 70         | 0          | 19.2       | 33.6       | 5.3        | 10.9       | 0          | 2.9        | 1.3       | 67         |
| S3   | 390        | 102       | 272        | 102        | 79         | 0          | 115.8      | 14.6       | 0          | 96.9       | 6.9        | 24.7       | 8.89      | 0          |
| S4   | 115        | 11        | 90         | 15         | 23         | 0          | 256.3      | 9.8        | 16.7       | 37.4       | 8.8        | 2.1        | 0.45      | 39         |
| S5   | 26         | 5         | 44         | 10         | 45         | 0.025      | 62.8       | 15.9       | 88.5       | 0          | 7.1        | 1.1        | 0.22      | 45         |
| S6   | 260        | 24        | 120        | 130        | 49         | 0          | 13.3       | 33.9       | 4.3        | 76.7       | 44         | 24.3       | 6.44      | 53         |
| S7   | 210        | 18        | 108        | 50         | 14         | 0          | 28.9       | 42.8       | 5.9        | 86.9       | 10.8       | 11.9       | 4.1       | 0          |
| S8   | 212        | 22        | 110        | 45         | 11         | 0          | 56.4       | 16.7       | 89.7       | 55.1       | 8.9        | 8.9        | 3.9       | 63         |
| S9   | 244        | 23        | 129        | 78         | 17         | 0          | 90.3       | 27.1       | 1.7        | 112        | 0          | 2.3        | 4.8       | 55         |
| S10  | 120        | 18        | 88         | 30         | 6          | 0.005      | 2.5        | 12.6       | 7.8        | 92.4       | 34.7       | 2.6        | 0.89      | 41         |
| S11  | 105        | 9         | 86         | 25         | 25         | 0.01       | 1.9        | 13.2       | 0          | 15.3       | 12.4       | 1.8        | 0.57      | 71         |
| S12  | 26         | 6         | 56         | 16         | 30         | 0.005      | 33         | 36.4       | 5.3        | 19.7       | 7.3        | 1.2        | 0.88      | 96         |
| S13  | 226        | 34        | 116        | 50         | 103        | 0          | 50.9       | 23.7       | 4.2        | 55.7       | 6.4        | 11.4       | 6.7       | 0          |
| S14  | 286        | 32        | 128        | 120        | 65         | 0          | 12.5       | 23.9       | 5.1        | 95.2       | 34.5       | 18.9       | 10.7      | 42         |
| S15  | 112        | 14        | 89         | 38         | 45         | 0.005      | 26.4       | 40.4       | 5.8        | 11.6       | 7.8        | 2.5        | 0.75      | 48         |
| S16  | 110        | 16        | 86         | 35         | 76         | 0.005      | 9.7        | 25.3       | 111.2      | 53.4       | 8.4        | 2.3        | 0.73      | 31         |
| S17  | 201        | 26        | 98         | 15         | 35         | 0.005      | 4.2        | 17.9       | 97.2       | 45.7       | 29.5       | 9.8        | 2.2       | 52         |
| S18  | 118        | 8         | 96         | 20         | 23         | 0          | 31.3       | 34.9       | 4.3        | 0          | 4.3        | 2.3        | 0.86      | 0          |
| S19  | 62         | 8         | 66         | 15         | 11         | 0.025      | 11.8       | 33.9       | 5.3        | 155        | 27.9       | 1.1        | 0.32      | 0          |
| S20  | 182        | 16        | 100        | 26         | 65         | 0.01       | 20         | 38.5       | 6.9        | 16         | 7.4        | 5.3        | 3.78      | 69         |
| S21  | 174        | 15        | 98         | 25         | 16         | 0          | 8.5        | 16.4       | 4.3        | 12.6       | 5.9        | 4.2        | 2.1       | 0          |
| S22  | 22         | 5         | 44         | 12         | 11         | 0.005      | 9.8        | 25.3       | 7.2        | 34.7       | 7.7        | 0.9        | 0.22      | 43         |
| S23  | 212        | 32        | 106        | 45         | 21         | 0          | 20.1       | 35.2       | 0          | 14.7       | 63.4       | 12.5       | 3.9       | 35         |
| S24  | 200        | 26        | 108        | 50         | 10         | 0          | 13.2       | 24.7       | 56.4       | 11.9       | 5.7        | 8.6        | 4         | 83         |
| S25  | 216        | 38        | 110        | 28         | 65         | 0.005      | 153        | 28         | 102        | 56.4       | 0          | 7.3        | 5.3       | 63.6       |

|     |      |      |     |     |     |       |       |      |       |      |      |      |      |      |
|-----|------|------|-----|-----|-----|-------|-------|------|-------|------|------|------|------|------|
| S26 | 24   | 6    | 46  | 25  | 80  | 0.025 | 8.9   | 21.4 | 4.5   | 61.2 | 44.3 | 1.2  | 0.21 | 72   |
| S27 | 86   | 16   | 80  | 20  | 19  | 0     | 4.4   | 13.5 | 0     | 24.8 | 7.8  | 1.3  | 0.42 | 58.3 |
| S28 | 68   | 11   | 74  | 15  | 15  | 0     | 12.3  | 29.7 | 108.7 | 14.6 | 8.7  | 1.9  | 0.33 | 47   |
| S29 | 219  | 28.5 | 112 | 40  | 9   | 0.005 | 6.9   | 22.3 | 3.6   | 12.4 | 15.4 | 6.8  | 2.7  | 87   |
| S30 | 128  | 28   | 90  | 15  | 282 | 0.01  | 5.9   | 21   | 2.1   | 27.6 | 8.7  | 2.7  | 0.44 | 51.4 |
| S31 | 32   | 5    | 58  | 14  | 77  | 0     | 103.6 | 29.8 | 103.7 | 63.2 | 0    | 1.1  | 0.32 | 44.5 |
| S32 | 296  | 28   | 120 | 80  | 27  | 0.005 | 20.7  | 36.1 | 6.3   | 36.4 | 8.7  | 9.9  | 3.74 | 65   |
| K1  | 128  | 11   | 96  | 20  | 87  | 0.005 | 2.4   | 13.6 | 0     | 16.3 | 7.3  | 0    | 1.7  | 0.87 |
| K2  | 72   | 9    | 76  | 10  | 3   | 0     | 6.5   | 22.7 | 3.9   | 33.2 | 8.8  | 89   | 1.4  | 0.33 |
| K3  | 106  | 8    | 86  | 25  | 14  | 0     | 11.8  | 32.9 | 6.4   | 89.6 | 3.1  | 0    | 1.7  | 0.56 |
| K4  | 108  | 10   | 88  | 30  | 32  | 0     | 12.9  | 30.8 | 7.9   | 33.5 | 8.2  | 15.4 | 1.4  | 0.63 |
| K5  | 216  | 18   | 104 | 40  | 8   | 0     | 3.9   | 14.6 | 11.8  | 89   | 0    | 53   | 4.9  | 3.7  |
| K6  | 1345 | 101  | 244 | 90  | 14  | 0     | 1.2   | 11.9 | 7.3   | 93   | 38.9 | 9    | 26.2 | 16.9 |
| K7  | 1349 | 103  | 260 | 149 | 88  | 0     | 38.1  | 35.3 | 6.7   | 33.8 | 7.9  | 46   | 22.5 | 18   |
| K8  | 1342 | 99   | 240 | 80  | 15  | 0     | 18.5  | 42.3 | 7.3   | 92.6 | 33.6 | 25   | 18.9 | 16   |
| K9  | 160  | 16   | 100 | 30  | 40  | 0     | 5.6   | 16.7 | 80.7  | 76.9 | 33.2 | 102  | 5.4  | 1.5  |
| K10 | 162  | 18   | 102 | 45  | 29  | 0     | 18.1  | 23.8 | 4.2   | 13.8 | 66.2 | 80.6 | 3    | 1.3  |
| K11 | 210  | 14   | 124 | 50  | 10  | 0     | 12.4  | 24.3 | 0     | 15.8 | 6.3  | 0    | 6.7  | 3.22 |
| K12 | 30   | 11   | 58  | 15  | 15  | 0     | 1.9   | 10.9 | 9.6   | 135  | 8.3  | 77   | 1.7  | 0.73 |
| K13 | 34   | 16   | 62  | 25  | 79  | 0     | 46.9  | 13.6 | 113.2 | 51.4 | 8.9  | 0    | 1.6  | 0.22 |
| K14 | 98   | 10.5 | 96  | 20  | 23  | 0     | 10.2  | 26.4 | 6.6   | 88.9 | 32.4 | 0    | 2.5  | 0.98 |
| K15 | 170  | 24   | 96  | 40  | 10  | 0     | 6.4   | 22.9 | 5.3   | 13.5 | 7.9  | 95   | 7.6  | 3.98 |
| K16 | 26   | 6    | 46  | 25  | 6   | 0     | 2.5   | 21   | 2.9   | 22.4 | 7.1  | 107  | 0.45 | 0.12 |
| K17 | 26   | 6    | 48  | 40  | 34  | 0.025 | 9.9   | 26.8 | 5.2   | 145  | 7.6  | 31   | 0.5  | 0.38 |
| K18 | 212  | 16   | 130 | 55  | 40  | 0     | 17.2  | 48.3 | 7.5   | 34.5 | 8.7  | 49   | 11.2 | 5.1  |
| K19 | 22   | 5    | 49  | 18  | 45  | 0.025 | 20    | 38.5 | 6.9   | 16   | 7.4  | 27   | 0.9  | 0.11 |
| K20 | 73   | 34   | 78  | 25  | 3   | 0     | 8.5   | 16.4 | 4.3   | 12.6 | 5.9  | 40   | 2.2  | 0.45 |
| K21 | 72   | 32   | 72  | 20  | 15  | 0     | 9.8   | 25.3 | 7.2   | 34.7 | 7.7  | 10   | 1.9  | 0.55 |
| K22 | 48   | 7    | 58  | 15  | 30  | 0.005 | 20.1  | 35.2 | 0     | 14.7 | 63.4 | 39   | 1.3  | 0.23 |
| K23 | 69   | 9    | 64  | 20  | 11  | 0.025 | 13.2  | 24.7 | 56.4  | 11.9 | 5.7  | 35   | 2.1  | 0.43 |
| K24 | 240  | 13   | 128 | 40  | 103 | 0     | 153   | 28   | 102   | 56.4 | 0    | 44   | 9.2  | 8.1  |
| K25 | 96   | 10   | 86  | 26  | 76  | 0.005 | 8.9   | 21.4 | 4.5   | 61.2 | 44.3 | 11   | 2.3  | 0.76 |
| K26 | 64   | 8    | 79  | 22  | 3   | 0     | 4.4   | 13.5 | 0     | 24.8 | 7.8  | 21   | 1.6  | 0.56 |
| K27 | 98   | 10.5 | 86  | 24  | 23  | 0     | 12.3  | 29.7 | 108.7 | 14.6 | 8.7  | 62   | 1.9  | 0.6  |
| K28 | 86   | 9    | 85  | 28  | 76  | 0.005 | 6.9   | 22.3 | 3.6   | 12.4 | 15.4 | 38   | 2.8  | 0.72 |
| K29 | 310  | 28   | 160 | 60  | 8   | 0     | 17.2  | 48.3 | 7.5   | 34.5 | 8.7  | 67   | 24.8 | 10.9 |
| K30 | 266  | 18   | 130 | 45  | 7   | 0     | 1.9   | 13.2 | 0     | 15.3 | 12.3 | 0    | 10.1 | 6.8  |
| J1  | 72   | 32   | 80  | 21  | 15  | 0     | 33    | 36.4 | 5.3   | 19.7 | 7.3  | 2.2  | 0.65 | 94   |
| J2  | 240  | 14   | 125 | 38  | 7   | 0     | 50.9  | 23.7 | 4.2   | 55.7 | 6.4  | 8.1  | 6.7  | 0    |
| J3  | 168  | 14   | 97  | 28  | 16  | 0     | 12.5  | 23.9 | 5.1   | 95.2 | 34.5 | 7.7  | 1.5  | 0    |
| J4  | 238  | 11   | 121 | 38  | 7   | 0     | 26.4  | 40.4 | 5.8   | 11.6 | 7.8  | 7.2  | 4.3  | 62.8 |
| J5  | 272  | 16   | 140 | 50  | 7   | 0     | 9.7   | 25.3 | 111.2 | 53.4 | 8.4  | 7.9  | 5.2  | 9    |
| J6  | 40   | 11   | 50  | 14  | 11  | 0.005 | 4.2   | 17.9 | 97.2  | 45.7 | 29.5 | 0.71 | 0.21 | 36   |
| J7  | 20   | 5    | 45  | 13  | 80  | 0.025 | 31.3  | 34.9 | 4.3   | 0    | 4.3  | 0.6  | 0.11 | 86   |
| J8  | 101  | 11   | 87  | 32  | 87  | 0.005 | 11.8  | 33.9 | 5.3   | 155  | 27.9 | 1.7  | 0.89 | 78   |
| J9  | 75   | 14   | 82  | 24  | 19  | 0     | 5.9   | 21   | 2.1   | 27.6 | 8.7  | 1.9  | 0.72 | 76   |
| J10 | 147  | 12   | 94  | 26  | 23  | 0     | 103.6 | 29.8 | 103.7 | 63.2 | 0    | 2.3  | 1.2  | 87   |
| J11 | 42   | 6    | 46  | 15  | 34  | 0.025 | 20.7  | 36.1 | 6.3   | 36.4 | 8.7  | 0.81 | 0.12 | 37   |
| J12 | 64   | 8    | 77  | 23  | 3   | 0     | 2.4   | 13.6 | 0     | 16.3 | 7.3  | 2.1  | 0.34 | 67   |

**Table S3. Water quality analyses foe irrigation of Sanghar district** (subdistrict Sangahr, Khipro and Jam Nawaz Ali).

| S ID | KI<br>meq/L | SAR<br>Meq/L | PI<br>meq/L | Na%<br>Meq/L |
|------|-------------|--------------|-------------|--------------|
| S1   | 1.1         | 1.6          | 94          | 65           |
| S2   | 0.8         | 1.1          | 101         | 54           |
| S3   | 0.8         | 1.2          | 67          | 57           |
| S4   | 0.9         | 1.1          | 103         | 55           |
| S5   | 0.4         | 0.5          | 101         | 36           |
| S6   | 0.7         | 1.9          | 72          | 53           |
| S7   | 1.0         | 1.7          | 94          | 59           |
| S8   | 1.0         | 1.7          | 92          | 60           |
| S9   | 0.8         | 1.6          | 81          | 56           |
| S10  | 0.8         | 1.2          | 95          | 54           |
| S11  | 0.7         | 1.1          | 96          | 51           |
| S12  | 0.3         | 0.4          | 98          | 31           |
| S13  | 1.0         | 1.7          | 93          | 61           |
| S14  | 0.8         | 1.9          | 75          | 56           |
| S15  | 0.6         | 1.1          | 90          | 50           |
| S16  | 0.7         | 1.1          | 92          | 51           |
| S17  | 1.4         | 1.8          | 103         | 67           |
| S18  | 0.8         | 1.1          | 98          | 52           |
| S19  | 0.6         | 0.8          | 111         | 46           |
| S20  | 1.1         | 1.6          | 95          | 61           |
| S21  | 1.1         | 1.5          | 96          | 61           |
| S22  | 0.3         | 0.4          | 107         | 33           |
| S23  | 1.0         | 1.7          | 89          | 62           |
| S24  | 0.9         | 1.6          | 85          | 59           |
| S25  | 1.2         | 1.7          | 96          | 65           |
| S26  | 0.2         | 0.5          | 88          | 30           |
| S27  | 0.7         | 0.9          | 101         | 50           |
| S28  | 0.6         | 0.8          | 107         | 47           |
| S29  | 1.1         | 1.7          | 92          | 62           |
| S30  | 1.0         | 1.2          | 106         | 60           |
| S31  | 0.3         | 0.5          | 103         | 34           |
| S32  | 1.0         | 2.1          | 87          | 62           |
| K1   | 47.5        | 1.2          | 101         | 55           |
| K2   | 42.0        | 0.8          | 112         | 49           |
| K3   | 43.0        | 1.1          | 97          | 51           |
| K4   | 41.8        | 1.1          | 94          | 50           |
| K5   | 53.6        | 1.8          | 96          | 62           |
| K6   | 75.6        | 4.8          | 101         | 81           |
| K7   | 70.6        | 4.5          | 95          | 78           |
| K8   | 76.5        | 4.9          | 102         | 82           |
| K9   | 49.6        | 1.4          | 92          | 58           |
| K10  | 45.9        | 1.4          | 88          | 55           |
| K11  | 47.8        | 1.5          | 84          | 56           |
| K12  | 27.7        | 0.4          | 99          | 36           |
| K13  | 26.7        | 0.5          | 87          | 36           |
| K14  | 41.2        | 0.9          | 95          | 48           |
| K15  | 49.6        | 1.5          | 93          | 59           |
| K16  | 22.7        | 0.5          | 89          | 31           |

|     |      |     |     |    |
|-----|------|-----|-----|----|
| K17 | 18.3 | 0.5 | 77  | 27 |
| K18 | 46.5 | 1.4 | 83  | 55 |
| K19 | 21.6 | 0.4 | 92  | 29 |
| K20 | 40.4 | 0.8 | 102 | 51 |
| K21 | 42.9 | 0.9 | 104 | 53 |
| K22 | 35.3 | 0.7 | 98  | 43 |
| K23 | 39.9 | 0.9 | 109 | 48 |
| K24 | 52.5 | 1.6 | 95  | 60 |
| K25 | 40.7 | 1.0 | 95  | 49 |
| K26 | 34.0 | 0.7 | 93  | 42 |
| K27 | 41.8 | 1.0 | 100 | 50 |
| K28 | 37.7 | 0.9 | 79  | 46 |
| K29 | 52.2 | 1.7 | 89  | 61 |
| K30 | 54.0 | 1.8 | 88  | 62 |
| J1  | 34.0 | 0.8 | 95  | 51 |
| J2  | 46.7 | 1.7 | 91  | 61 |
| J3  | 44.7 | 1.5 | 94  | 59 |
| J4  | 47.0 | 1.7 | 92  | 61 |
| J5  | 46.3 | 1.7 | 85  | 60 |
| J6  | 29.2 | 0.7 | 102 | 44 |
| J7  | 18.4 | 0.4 | 84  | 30 |
| J8  | 34.5 | 1.0 | 95  | 48 |
| J9  | 31.0 | 0.8 | 94  | 46 |
| J10 | 42.4 | 1.4 | 95  | 57 |
| J11 | 30.2 | 0.8 | 106 | 44 |
| J12 | 28.3 | 0.7 | 90  | 42 |
